# Supplementary material
Source: publisher figshare collection journal article supplement (https://frontiersin.figshare.com/ndownloader/files/17615846)

1 **Supplemental Figure S1: Peptides of PP1 that were not protected by 1E7-07 from**  
2 **ELNLLB painting.** Ion elution profiles (top) and integrated intensities (bottom) of  
3 control (group i), ELNLLB painting (group ii) and PP1-1E7-07 complex with ELNLLB  
4 painting (group iii) are shown in blue, red and green, respectively.

5  
6 **Supplemental Figure S2: 1E7-07 does not affect cellular localization of PP1.** (A)  
7 293T cells were transfected with PP1-mCherry vector and treated with 1E7-07 for 24 hr.  
8 At twenty-four hr post transfection, the cells were treated with 10  $\mu$ M 1E7-07 or DMSO as  
9 vehicle control. Cells also stained with Hechts. At forty-eight hr posttransfection the cells  
10 were photographed on Olympus IX73 using filters for Texas Red and Hechts fluorescence  
11 at 600X magnification. (B) PP1 is translocated to the nucleus when co-expressed with  
12 cdNIPP1. 293T cells were transfected with vectors expressing PP1 $\gamma$ -mCherry or PP1 $\gamma$ -  
13 mCherry and cdNIPP1-EGFP. At forty-eight hr posttransfection the cells were  
14 photographed on Olympus IX73 using filters for Texas Red and FITC fluorescence with  
15 400X magnification.

# Supplemental Figure S1

AHQVVEDGYEFAK

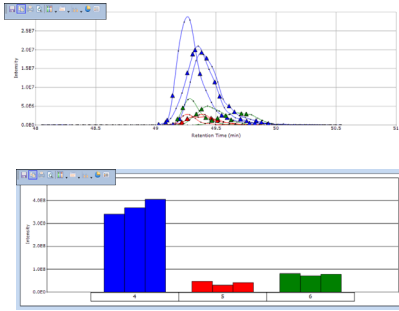

FLHKHDLDLICR

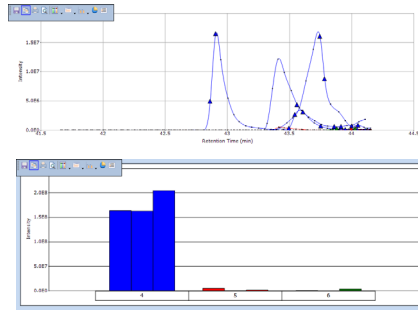

IKYPENFFLLR

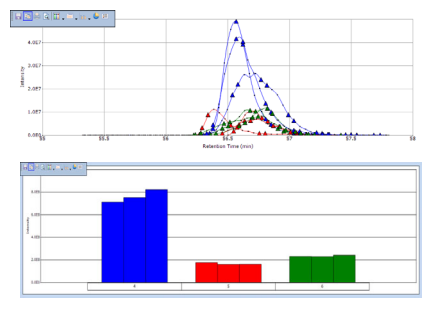

LLEVQGSRRPGK

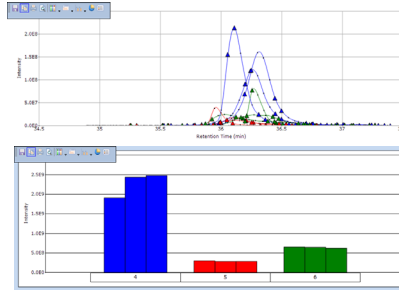

QSLETICLLLAYK

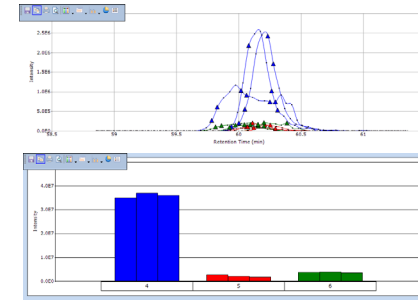

AHQVVEDGYEFAKR

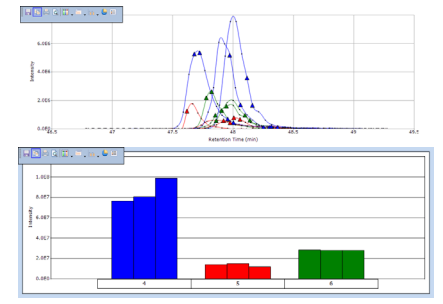

GKQSLETICLLLAYK

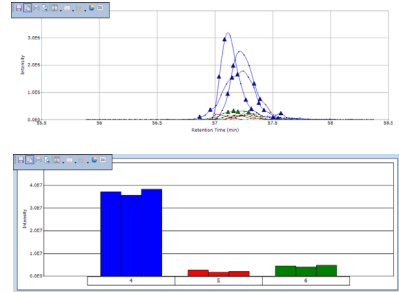

IYGFYDEcK

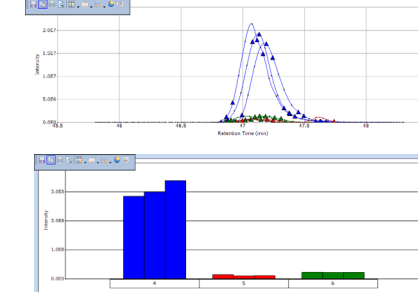

LLEVQGSRRPGKNVQLTENEIR

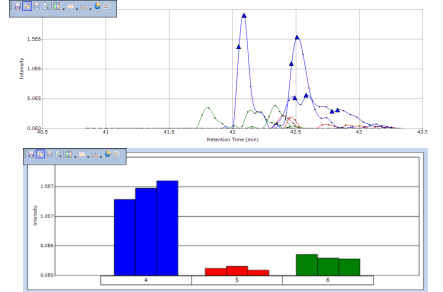

SREIFLSQPILLELEAPLK

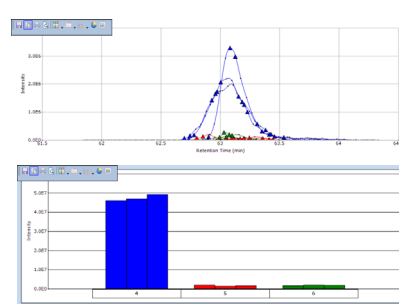

EIFLSQPILLELEAPLK

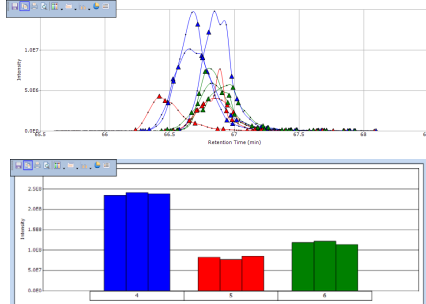

GVSFTFGAEVVAK

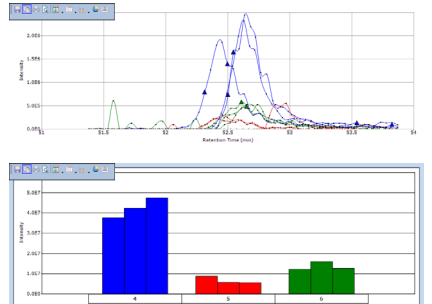

IYGFYDEcKR

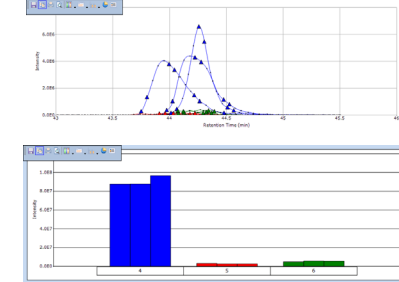

NVQLTENEIR

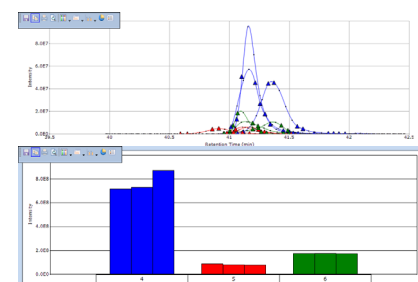

TFTDcFNcLPAAIVDEK

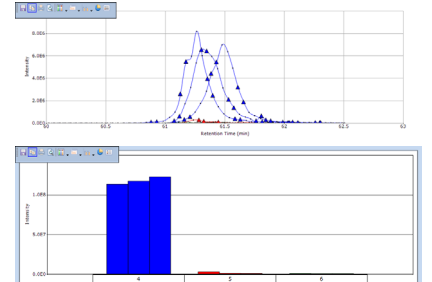

YPENFFLLR

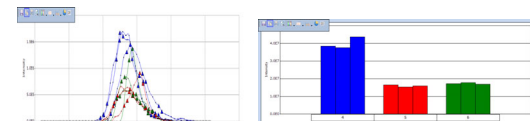

YNIKLWK

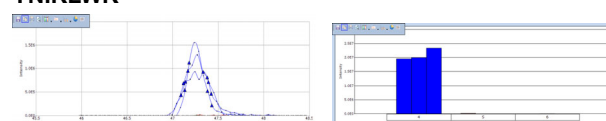

Control  
Painting  
1E7-07+Painting

## Supplemental Figure S2

**A**

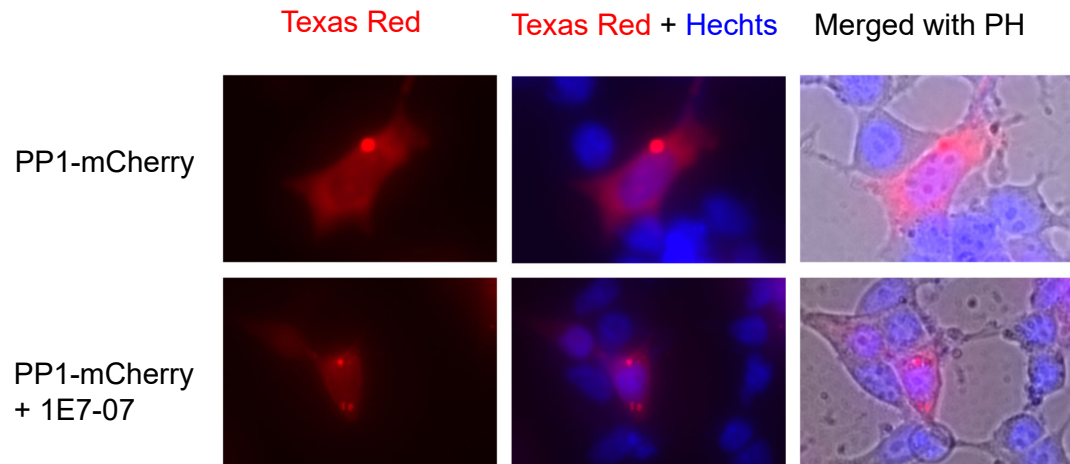

**B**

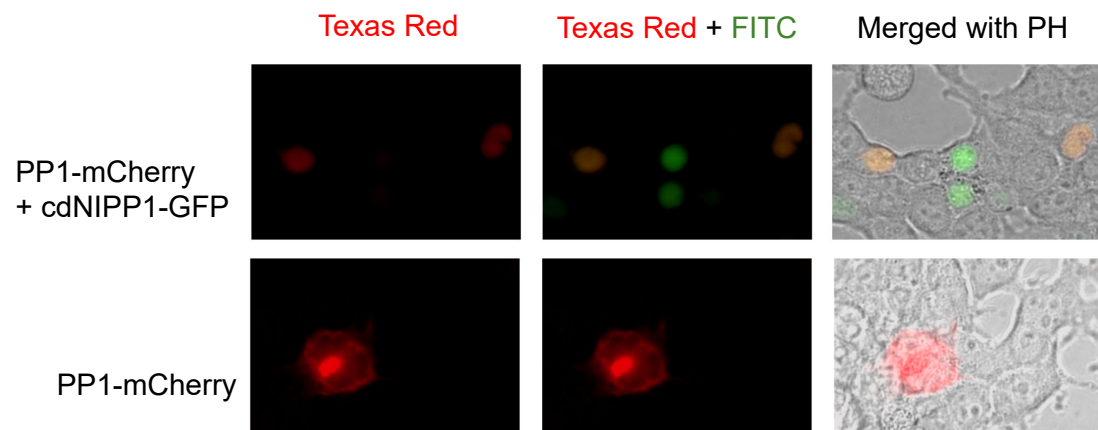

Supplement: Supplementary file [file 17615846]
